# Supplementary material for: Tracing origins of uranium ore concentrates (UOCs) by multidimensional statistical analysis of rare-earth impurities
Source: Royal Society of Chemistry journal article supplement (doi:10.1039/c4ja00354c), 2014-11-19
Supplement: c4ja00354c1.pdf [file c4ja00354c1.pdf]

Supplementary Information for:

**Tracing origins of uranium ore concentrates (UOCs) by  
multidimensional statistics analysis of rare-earth impurities**

Mu Lin<sup>a,b</sup>, Yonggang Zhao<sup>a,\*</sup>, Lifei Zhao<sup>a</sup>, Lili Li<sup>a</sup>, Fan Wang<sup>a</sup>, Liuchao Zhu<sup>a</sup>,  
Xiaonan Hu<sup>a</sup> and Wei Ning<sup>a</sup>

<sup>a</sup> Department of Radiochemistry, China Institute of Atomic Energy, Beijing, China

<sup>b</sup> State Nuclear Power Research Institute, Beijing, China

\* Corresponding author. Box 8, P.O. BOX 275, Beijing, China. Tel.: +86-10-69358448; Fax: +86-10-69357936. E-mail address: [zhaoyg@ciae.ac.cn](mailto:zhaoyg@ciae.ac.cn)



Table.1. (Continued)

| Country  | Location        | Deposit Name   | Deposit Type         | La          | Ce                   | Pr       | Nd       | Sm       | Eu       | Gd       | Tb       | Dy       | Ho       | Er       | Tm       | Yb       | Lu       | Instrument | Reference       |      |                |
|----------|-----------------|----------------|----------------------|-------------|----------------------|----------|----------|----------|----------|----------|----------|----------|----------|----------|----------|----------|----------|------------|-----------------|------|----------------|
| Canada   | Athabasca basin | McArthur River | Unconformity-related | 1.20E+00    | 3.50E+00             | 1.50E+00 | 8.90E+00 | 2.10E+01 | 2.60E+01 | N.A.     | 4.70E+01 | 4.40E+02 | 5.50E+01 | 1.30E+02 | 1.20E+01 | N.A.     | 3.70E+00 | SIMS       | 9 <sup>a</sup>  |      |                |
|          |                 |                |                      | 1.50E+00    | 3.60E+00             | 1.80E+00 | 1.10E+01 | 2.30E+01 | 2.90E+01 | N.A.     | 4.50E+01 | 4.70E+02 | 5.40E+01 | 1.40E+02 | 1.20E+01 | N.A.     | 3.80E+00 |            |                 |      |                |
|          |                 | Millennium     | Unconformity-related | 2.20E+00    | 1.90E+01             | 5.30E+00 | 3.50E+01 | 5.70E+01 | 2.30E+01 | N.A.     | 7.80E+01 | 5.10E+02 | 5.50E+01 | 9.80E+01 | 1.80E+01 | N.A.     | 1.30E+01 | SIMS       | 9 <sup>a</sup>  |      |                |
|          |                 |                |                      | 2.10E+00    | 1.90E+01             | 5.10E+00 | 3.40E+01 | 5.40E+01 | 2.20E+01 | N.A.     | 7.70E+01 | 5.00E+02 | 5.50E+01 | 1.00E+02 | 1.80E+01 | N.A.     | 1.20E+01 |            |                 |      |                |
|          |                 |                |                      | 2.10E+00    | 1.90E+01             | 5.20E+00 | 3.50E+01 | 6.10E+01 | 2.60E+01 | N.A.     | 8.90E+01 | 5.90E+02 | 6.50E+01 | 1.20E+02 | 2.10E+01 | N.A.     | 1.50E+01 |            |                 |      |                |
|          |                 |                |                      | 5.10E+00    | 2.30E+01             | 6.00E+00 | 3.20E+01 | 1.80E+02 | 3.50E+01 | N.A.     | 7.20E+01 | 4.10E+02 | 1.80E+01 | 1.50E+02 | 1.60E+01 | N.A.     | 1.10E+01 |            |                 |      |                |
|          |                 |                |                      | 2.10E+00    | 2.10E+01             | 5.40E+00 | 3.30E+01 | 5.20E+01 | 2.70E+01 | N.A.     | 1.10E+02 | 7.50E+02 | 8.70E+01 | 1.70E+02 | 2.70E+01 | N.A.     | 1.80E+01 |            |                 |      |                |
|          |                 |                |                      | 6.00E+02    | 2.70E+03             | 9.60E+02 | 4.90E+03 | 1.90E+03 | 2.30E+02 | N.A.     | 6.60E+02 | 5.00E+03 | 1.10E+03 | 3.40E+03 | 5.30E+02 | N.A.     | 1.50E+02 |            |                 | SIMS | 9 <sup>a</sup> |
|          |                 |                |                      | 6.10E+02    | 2.40E+03             | 7.80E+02 | 3.90E+03 | 1.60E+03 | 2.10E+02 | N.A.     | 4.60E+02 | 3.70E+03 | 8.80E+02 | 2.60E+03 | 3.80E+02 | N.A.     | 8.10E+01 |            |                 |      |                |
|          |                 |                |                      | Sue deposit | Unconformity-related | 3.60E-01 | 5.80E+00 | 1.70E+00 | 1.30E+01 | 5.20E+00 | 7.70E+00 | N.A.     | 3.20E+01 | 2.60E+02 | 4.00E+01 | 6.50E+01 | 7.90E+00 |            |                 | N.A. | 2.00E+00       |
|          | 1.80E-01        | 2.50E+00       | 5.10E+00             |             |                      | 5.60E+00 | 1.80E+01 | 5.00E+00 | N.A.     | 2.90E+01 | 2.30E+02 | 3.50E+01 | 5.50E+01 | 7.00E+00 | N.A.     | 1.90E+00 |          |            |                 |      |                |
|          | Labrador trough | Mistamisk      | Synmetamorphic       | 1.90E+02    | 2.40E+03             | 4.70E+02 | 2.70E+03 | 1.30E+03 | 2.70E+02 | N.A.     | 3.40E+02 | 1.90E+03 | 4.40E+02 | 8.60E+02 | 1.30E+02 | N.A.     | 5.00E+01 | SIMS       | 9 <sup>a</sup>  |      |                |
|          |                 |                |                      | 1.90E+02    | 2.40E+03             | 4.90E+02 | 2.80E+03 | 1.40E+03 | 3.00E+02 | N.A.     | 3.80E+02 | 2.20E+03 | 4.90E+02 | 1.00E+03 | 1.40E+02 | N.A.     | 5.30E+01 |            |                 |      |                |
|          |                 |                |                      | 2.10E+02    | 2.40E+03             | 4.90E+02 | 2.80E+03 | 1.40E+03 | 2.90E+02 | N.A.     | 3.20E+02 | 2.00E+03 | 3.70E+02 | 9.30E+02 | 1.20E+02 | N.A.     | 5.70E+01 |            |                 |      |                |
|          |                 |                |                      | 1.90E+02    | 2.10E+03             | 4.30E+02 | 2.50E+03 | 1.20E+03 | 2.50E+02 | N.A.     | 3.20E+02 | 1.90E+03 | 3.40E+02 | 8.50E+02 | 1.20E+02 | N.A.     | 5.70E+01 |            |                 |      |                |
| 1.70E+02 |                 |                |                      | 2.00E+03    | 4.30E+02             | 2.50E+03 | 1.20E+03 | 2.70E+02 | N.A.     | 3.30E+02 | 2.00E+03 | 3.70E+02 | 9.40E+02 | 1.30E+02 | N.A.     | 6.20E+01 |          |            |                 |      |                |
| 2.00E+02 |                 |                |                      | 2.40E+03    | 4.90E+02             | 2.90E+03 | 1.40E+03 | 3.10E+02 | N.A.     | 3.60E+02 | 2.20E+03 | 4.00E+02 | 1.00E+03 | 1.40E+02 | N.A.     | 6.60E+01 |          |            |                 |      |                |
| 1.33E+01 |                 |                |                      | 2.80E+01    | 3.50E+00             | 1.34E+01 | 2.50E+00 | 5.90E-01 | 2.30E+00 | 3.70E-01 | 2.10E+00 | 4.10E-01 | 1.20E+00 | 1.90E-01 | 1.40E+00 | 1.90E-01 |          |            |                 |      |                |
| Czech    | Bohemian Massif | Rozna          | Unconformity-related | 1.20E+01    | 2.77E+01             | 3.90E+00 | 1.72E+01 | 5.60E+00 | 6.50E-01 | 6.10E+00 | 1.30E+00 | 9.10E+00 | 1.90E+00 | 6.10E+00 | 9.90E-01 | 6.70E+00 | 1.00E+00 | ICP-MS     | 12 <sup>b</sup> |      |                |
|          |                 |                |                      | 2.10E+01    | 4.48E+01             | 5.50E+00 | 2.27E+01 | 5.50E+00 | 1.20E+00 | 6.30E+00 | 1.20E+00 | 7.30E+00 | 1.50E+00 | 4.10E+00 | 6.70E-01 | 4.20E+00 | 6.00E-01 |            |                 |      |                |
|          |                 |                |                      | 2.82E+01    | 6.99E+01             | 9.40E+00 | 4.40E+01 | 1.10E+01 | 5.70E+00 | 1.38E+01 | 1.90E+00 | 1.09E+01 | 2.30E+00 | 5.90E+00 | 7.20E-01 | 4.60E+00 | 7.30E-01 |            |                 |      |                |
|          |                 |                |                      | 2.38E+01    | 4.64E+01             | 5.50E+00 | 2.13E+01 | 4.10E+00 | 1.10E+00 | 3.90E+00 | 6.30E-01 | 3.50E+00 | 7.00E-01 | 2.00E+00 | 3.10E-01 | 2.00E+00 | 3.00E-01 |            |                 |      |                |

Table.1. (Continued)

| Country  | Location               | Deposit Name     | Deposit Type         | La       | Ce       | Pr       | Nd       | Sm       | Eu       | Gd       | Tb       | Dy       | Ho       | Er       | Tm       | Yb       | Lu       | Instrument | Reference       |
|----------|------------------------|------------------|----------------------|----------|----------|----------|----------|----------|----------|----------|----------|----------|----------|----------|----------|----------|----------|------------|-----------------|
| Czech    | Bohemian Massif        | Rozna            | Unconformity-related | 1.08E+01 | 1.75E+01 | 2.10E+00 | 8.10E+00 | 1.90E+00 | 7.40E-01 | 1.90E+00 | 3.30E-01 | 1.90E+00 | 4.10E-01 | 1.10E+00 | 1.50E-01 | 8.40E-01 | 1.30E-01 | ICP-MS     | 12 <sup>b</sup> |
|          |                        | Okrouhla         | Unconformity-related | 4.29E+01 | 8.27E+01 | 9.40E+00 | 3.50E+01 | 6.50E+00 | 1.10E+00 | 6.20E+00 | 8.30E-01 | 4.70E+00 | 8.60E-01 | 2.50E+00 | 3.80E-01 | 2.30E+00 | 3.10E-01 | ICP-MS     | 12 <sup>b</sup> |
|          |                        | Radoun           |                      | 1.91E+01 | 4.01E+01 | 4.40E+00 | 1.71E+01 | 4.40E+00 | 1.00E+00 | 4.40E+00 | 8.20E-01 | 5.40E+00 | 1.10E+00 | 3.40E+00 | 4.40E-01 | 3.20E+00 | 4.60E-01 |            |                 |
|          |                        |                  |                      | 3.77E+01 | 7.58E+01 | 8.70E+00 | 3.30E+01 | 6.40E+00 | 1.50E+00 | 5.40E+00 | 9.40E-01 | 5.30E+00 | 1.00E+00 | 2.90E+00 | 4.70E-01 | 2.80E+00 | 4.20E-01 |            |                 |
| Denmark  | Greenland              | Motzfeldt Centre | Intrusive            | 1.02E+00 | 1.61E+01 | 1.10E+00 | 1.33E+01 | 2.16E+01 | 2.73E+00 | 8.62E+01 | 2.77E+01 | 3.28E+02 | 1.06E+02 | 4.31E+02 | 8.39E+01 | 6.50E+02 | 9.78E+01 | LA-ICPMS   | 13 <sup>c</sup> |
|          |                        |                  |                      | 1.46E+01 | 1.41E+02 | 1.27E+01 | 7.52E+01 | 5.70E+01 | 9.55E+00 | 1.53E+02 | 4.69E+01 | 5.21E+02 | 1.55E+02 | 5.96E+02 | 1.09E+02 | 8.35E+02 | 1.17E+02 |            |                 |
|          |                        |                  |                      | 9.57E+00 | 2.34E+02 | 3.55E+01 | 2.42E+02 | 1.12E+02 | 1.85E+01 | 1.69E+02 | 3.97E+01 | 3.79E+02 | 9.81E+01 | 3.56E+02 | 6.32E+01 | 4.75E+02 | 6.70E+01 |            |                 |
|          |                        |                  |                      | 1.08E+01 | 7.33E+01 | 9.09E+00 | 5.01E+01 | 3.90E+01 | 5.35E+00 | 8.51E+01 | 2.48E+01 | 2.87E+02 | 8.17E+01 | 3.19E+02 | 5.91E+01 | 4.52E+02 | 6.10E+01 |            |                 |
|          |                        |                  |                      | 6.93E+01 | 8.37E+02 | 1.08E+02 | 6.19E+02 | 2.93E+02 | 3.78E+01 | 4.39E+02 | 1.01E+02 | 9.11E+02 | 2.29E+02 | 7.95E+02 | 1.34E+02 | 9.48E+02 | 1.33E+02 |            |                 |
|          |                        |                  |                      | 6.71E+01 | 6.87E+02 | 8.39E+01 | 4.36E+02 | 2.46E+02 | 5.04E+01 | 3.60E+02 | 8.47E+01 | 6.98E+02 | 1.57E+02 | 5.20E+02 | 8.77E+01 | 6.33E+02 | 8.24E+01 |            |                 |
|          |                        |                  |                      | 3.43E+00 | 8.68E+00 | 1.26E+00 | 7.61E+00 | 5.67E+00 | 1.05E+00 | 1.81E+01 | 6.76E+00 | 7.66E+01 | 2.11E+01 | 8.07E+01 | 1.49E+01 | 1.18E+02 | 1.74E+01 |            |                 |
|          |                        |                  |                      | 2.32E+01 | 4.34E+01 | 1.19E+01 | 5.93E+01 | 3.09E+01 | 5.31E+00 | 5.56E+01 | 1.74E+01 | 1.96E+02 | 5.55E+01 | 2.14E+02 | 3.89E+01 | 2.78E+02 | 3.21E+01 |            |                 |
|          |                        |                  |                      | 2.72E+01 | 6.91E+01 | 1.51E+01 | 7.54E+01 | 4.39E+01 | 5.94E+00 | 9.37E+01 | 2.90E+01 | 3.19E+02 | 8.76E+01 | 3.27E+02 | 5.76E+01 | 4.23E+02 | 5.63E+01 |            |                 |
|          |                        |                  |                      | 3.42E+01 | 1.03E+02 | 1.71E+01 | 8.76E+01 | 5.27E+01 | 7.45E+00 | 1.33E+02 | 4.13E+01 | 4.62E+02 | 1.33E+02 | 5.25E+02 | 9.57E+01 | 7.30E+02 | 1.01E+02 |            |                 |
| 2.66E+01 | 7.59E+01               | 7.08E+00         | 3.15E+01             | 1.27E+01 | 1.58E+00 | 3.05E+01 | 9.72E+00 | 1.06E+02 | 3.30E+01 | 1.30E+02 | 2.42E+01 | 1.93E+02 | 2.97E+01 |          |          |          |          |            |                 |
| 4.47E+01 | 5.75E+01               | 1.75E+01         | 8.33E+01             | 3.20E+01 | 4.02E+00 | 5.40E+01 | 1.87E+01 | 2.03E+02 | 5.56E+01 | 2.10E+02 | 3.70E+01 | 2.59E+02 | 3.06E+01 |          |          |          |          |            |                 |
| Finland  | Nummi-Pusula peninsula | Luthi            | Intrusive            | 4.10E+00 | 2.60E+03 | 1.10E+03 | 6.50E+03 | 3.00E+03 | 3.20E+02 | N.A.     | 6.60E+02 | 4.60E+03 | 1.10E+03 | 2.10E+03 | 2.90E+02 | N.A.     | 3.20E+01 | SIMS       | 9 <sup>a</sup>  |
|          |                        |                  |                      | 5.80E-01 | 4.60E+03 | 1.70E+03 | 7.80E+03 | 3.00E+03 | 1.40E+02 | N.A.     | 8.00E+02 | 5.10E+03 | 1.20E+03 | 2.40E+03 | 2.70E+02 | N.A.     | 2.60E+01 |            |                 |
| France   | Massif Central         | Bois Noirs       | Vein                 | 1.60E+03 | 3.20E+03 | 3.10E+02 | 1.10E+03 | 1.70E+02 | 2.10E+01 | 1.80E+02 | 1.70E+01 | 8.00E+01 | 1.50E+01 | 3.70E+01 | 4.00E+00 | 3.00E+01 | 5.00E+00 | LA-ICPMS   | 9 <sup>a</sup>  |
|          |                        |                  |                      | 1.40E+03 | 3.10E+03 | 3.00E+02 | 1.10E+03 | 1.60E+02 | 2.10E+01 | 1.80E+02 | 1.80E+01 | 8.20E+01 | 1.50E+01 | 3.80E+01 | 5.00E+00 | 2.90E+01 | 5.00E+00 |            |                 |
|          |                        |                  |                      | 1.40E+03 | 2.90E+03 | 2.90E+02 | 1.10E+03 | 1.80E+02 | 1.40E+01 | 2.10E+02 | 2.10E+01 | 1.10E+02 | 1.70E+01 | 4.50E+01 | 6.00E+00 | 3.40E+01 | 5.00E+00 |            |                 |
|          | 1.50E+03               | 3.00E+03         | 3.10E+02             | 1.20E+03 | 2.00E+02 | 1.60E+01 | 2.30E+02 | 2.30E+01 | 1.10E+02 | 2.00E+01 | 5.50E+01 | 6.00E+00 | 3.80E+01 | 6.00E+00 |          |          |          |            |                 |

Table.1. (Continued)

| Country  | Location         | Deposit Name | Deposit Type             | La       | Ce       | Pr       | Nd       | Sm       | Eu       | Gd       | Tb       | Dy       | Ho       | Er       | Tm       | Yb       | Lu       | Instrument | Reference       |                |
|----------|------------------|--------------|--------------------------|----------|----------|----------|----------|----------|----------|----------|----------|----------|----------|----------|----------|----------|----------|------------|-----------------|----------------|
| France   | Armorican massif | Commanderie  | Vein                     | 1.70E+03 | 2.60E+03 | 2.10E+02 | 7.20E+02 | 6.80E+01 | 1.00E+01 | 1.20E+02 | 6.00E+00 | 2.00E+01 | 3.00E+00 | 9.20E+00 | 9.00E-01 | 2.90E+00 | 7.00E-01 | LA-ICPMS   | 9 <sup>a</sup>  |                |
|          |                  |              |                          | 1.30E+03 | 1.70E+03 | 1.40E+02 | 4.60E+02 | 4.30E+01 | 6.00E+00 | 8.00E+01 | 5.00E+00 | 1.30E+01 | 2.00E+00 | 5.10E+00 | 6.00E-01 | 2.80E+00 | 5.00E-01 |            |                 |                |
|          |                  |              | Ecarpiere                | Vein     | 3.60E+02 | 3.90E+02 | 2.50E+01 | 7.90E+01 | 1.00E+01 | 4.00E+00 | 1.70E+01 | 1.30E+00 | 7.40E+00 | 1.10E+00 | 3.80E+00 | 6.00E-01 | 3.20E+00 | 7.00E-01   | LA-ICPMS        | 9 <sup>a</sup> |
|          |                  |              |                          |          | 3.50E+02 | 3.20E+02 | 1.90E+01 | 5.80E+01 | 5.60E+00 | 3.00E+00 | 1.30E+01 | 1.20E+00 | 4.00E+00 | 8.00E-01 | 2.10E+00 | 2.00E-01 | 2.10E+00 | 2.00E-01   |                 |                |
| Japan    | Ceteral Japan    | Tono         | Sandstone                | 3.35E+02 | 1.20E+03 | 1.85E+02 | 1.21E+03 | 2.02E+02 | 3.20E+01 | 1.81E+02 | 1.93E+01 | 1.26E+02 | 3.18E+01 | 9.00E+01 | 1.35E+01 | 8.26E+01 | 1.52E+01 | ICP-MS     | 14 <sup>d</sup> |                |
|          |                  |              |                          | 4.85E+02 | 1.46E+03 | 2.63E+02 | 1.43E+03 | 3.06E+02 | 4.16E+01 | 2.22E+02 | 2.78E+01 | 2.03E+02 | 5.32E+01 | 1.69E+02 | 2.74E+01 | 2.31E+02 | 4.12E+01 |            |                 |                |
|          |                  |              |                          | 1.28E+03 | 6.35E+03 | 1.03E+03 | 7.04E+03 | 1.44E+03 | 2.13E+02 | 1.07E+03 | 1.44E+02 | 9.26E+02 | 2.09E+02 | 6.34E+02 | 1.00E+02 | 6.50E+02 | 1.31E+02 |            |                 |                |
|          |                  |              |                          | 3.09E+02 | 1.45E+03 | 2.05E+02 | 1.58E+03 | 3.85E+02 | 5.53E+01 | 2.79E+02 | 4.51E+01 | 3.10E+02 | 6.71E+01 | 2.03E+02 | 3.71E+01 | 2.89E+02 | 4.85E+01 |            |                 |                |
|          | Southwest Japan  | Unazuki      | Unconformity<br>-related | 1.50E-03 | 3.00E+01 | 2.20E-02 | 2.30E-01 | 8.80E-01 | 9.50E-01 | 1.50E+01 | 7.70E+00 | 1.26E+02 | 4.60E+01 | 2.65E+02 | 5.10E+01 | 5.28E+02 | 1.54E+02 | SHRIMP     | 15 <sup>e</sup> |                |
|          |                  |              |                          | 3.00E-01 | 8.94E+02 | 2.40E-01 | 4.60E+00 | 1.90E+01 | 2.00E+01 | 2.62E+02 | 1.23E+02 | 1.85E+03 | 6.16E+02 | 3.05E+03 | 5.60E+02 | 5.03E+03 | 1.17E+03 |            |                 |                |
|          |                  |              |                          | 1.40E-02 | 2.50E+02 | 4.30E-02 | 9.10E-01 | 5.30E+00 | 6.30E+00 | 9.10E+01 | 5.10E+01 | 8.85E+02 | 3.24E+02 | 1.77E+03 | 3.40E+02 | 3.23E+03 | 7.74E+02 |            |                 |                |
|          |                  |              |                          | 1.10E-01 | 6.46E+02 | 1.30E-01 | 2.60E+00 | 1.30E+01 | 1.40E+01 | 1.82E+02 | 8.60E+01 | 1.29E+03 | 4.28E+02 | 2.11E+03 | 3.74E+02 | 3.31E+03 | 7.42E+02 |            |                 |                |
|          |                  |              |                          | 1.40E-02 | 8.00E+01 | 3.40E-02 | 4.10E-01 | 1.50E+00 | 1.60E+00 | 2.20E+01 | 1.10E+01 | 1.79E+02 | 6.20E+01 | 3.32E+02 | 6.40E+01 | 6.04E+02 | 1.57E+02 |            |                 |                |
|          |                  |              |                          | 5.40E-02 | 4.24E+02 | 1.10E-01 | 2.00E+00 | 9.00E+00 | 9.80E+00 | 1.25E+02 | 6.10E+01 | 9.38E+02 | 3.15E+02 | 1.59E+03 | 2.95E+02 | 2.70E+03 | 6.28E+02 |            |                 |                |
|          |                  |              |                          | 3.10E-02 | 3.85E+02 | 8.20E-02 | 1.60E+00 | 8.40E+00 | 9.50E+00 | 1.45E+02 | 7.90E+01 | 1.34E+03 | 4.80E+02 | 2.53E+03 | 4.75E+02 | 4.44E+03 | 1.05E+03 |            |                 |                |
|          |                  |              |                          | 4.30E-03 | 4.67E+02 | 5.70E-02 | 1.40E+00 | 8.50E+00 | 9.50E+00 | 1.29E+02 | 6.30E+01 | 9.90E+02 | 3.36E+02 | 1.72E+03 | 3.20E+02 | 2.87E+03 | 6.83E+02 |            |                 |                |
|          |                  |              |                          | 3.50E-03 | 2.33E+02 | 3.70E-02 | 7.90E-01 | 4.50E+00 | 5.10E+00 | 6.90E+01 | 3.40E+01 | 5.43E+02 | 1.92E+02 | 1.02E+03 | 1.95E+02 | 1.84E+03 | 4.43E+02 |            |                 |                |
|          |                  |              |                          | 2.60E-02 | 8.78E+02 | 1.00E-01 | 2.50E+00 | 1.40E+01 | 1.50E+01 | 2.05E+02 | 1.02E+02 | 1.65E+03 | 5.69E+02 | 2.90E+03 | 5.34E+02 | 4.74E+03 | 1.07E+03 |            |                 |                |
|          |                  |              |                          | 2.40E-02 | 4.70E+01 | 2.00E-02 | 2.80E-01 | 1.80E+00 | 1.60E+00 | 1.50E+01 | 6.20E+00 | 1.04E+02 | 3.90E+01 | 2.35E+02 | 5.20E+01 | 5.55E+02 | 1.50E+02 |            |                 |                |
|          |                  |              |                          | 7.30E-01 | 5.11E+02 | 3.60E-01 | 4.80E+00 | 1.40E+01 | 1.50E+01 | 1.60E+02 | 7.60E+01 | 1.17E+03 | 3.89E+02 | 1.98E+03 | 3.69E+02 | 3.29E+03 | 7.76E+02 |            |                 |                |
| 2.50E-01 | 1.35E+02         | 1.70E-01     | 1.50E+00                 | 3.40E+00 | 3.90E+00 | 4.20E+01 | 2.00E+01 | 3.49E+02 | 1.30E+02 | 6.95E+02 | 1.35E+02 | 1.25E+03 | 2.93E+02 |          |          |          |          |            |                 |                |
| 5.50E-02 | 6.10E+01         | 4.80E-02     | 5.80E-01                 | 1.60E+00 | 1.70E+00 | 2.20E+01 | 1.10E+01 | 1.77E+02 | 6.30E+01 | 3.39E+02 | 7.00E+01 | 6.28E+02 | 1.62E+02 |          |          |          |          |            |                 |                |

Table.1. (Continued)

| Country  | Deposit Name    | Location                  | Deposit Type             | La       | Ce       | Pr       | Nd       | Sm       | Eu       | Gd       | Tb       | Dy       | Ho       | Er       | Tm       | Yb       | Lu       | Instrument | Reference       |
|----------|-----------------|---------------------------|--------------------------|----------|----------|----------|----------|----------|----------|----------|----------|----------|----------|----------|----------|----------|----------|------------|-----------------|
| Japan    | Unazuki         | Southwest Japan           | Unconformity<br>-related | 5.60E-03 | 1.44E+02 | 3.40E-02 | 5.80E-01 | 2.70E+00 | 2.90E+00 | 4.00E+01 | 2.00E+01 | 3.18E+02 | 1.12E+02 | 5.73E+02 | 1.12E+02 | 1.00E+03 | 2.35E+02 | SHRIMP     | 15 <sup>c</sup> |
|          |                 |                           |                          | 1.00E-01 | 1.61E+02 | 1.20E-01 | 1.20E+00 | 3.00E+00 | 3.30E+00 | 4.10E+01 | 2.10E+01 | 3.31E+02 | 1.15E+02 | 6.14E+02 | 1.28E+02 | 1.11E+03 | 2.69E+02 |            |                 |
|          |                 |                           |                          | 3.30E-02 | 5.10E+01 | 1.40E-01 | 2.60E+00 | 7.00E+00 | 8.40E+00 | 1.18E+02 | 4.60E+01 | 6.97E+02 | 2.33E+02 | 1.18E+03 | 2.19E+02 | 1.93E+03 | 4.29E+02 |            |                 |
|          |                 |                           |                          | 2.70E-02 | 2.27E+02 | 3.90E-02 | 7.70E-01 | 4.20E+00 | 4.50E+00 | 6.20E+01 | 3.10E+01 | 4.97E+02 | 1.72E+02 | 7.43E+02 | 1.74E+02 | 1.61E+03 | 3.75E+02 |            |                 |
|          |                 |                           |                          | 1.80E+01 | 2.53E+03 | 1.70E+01 | 2.02E+02 | 1.93E+02 | 2.55E+02 | 7.00E+02 | 1.67E+02 | 1.70E+03 | 5.08E+02 | 2.07E+03 | 3.89E+02 | 3.15E+03 | 7.33E+02 |            |                 |
|          |                 |                           |                          | 5.30E+01 | 4.88E+03 | 3.40E+01 | 2.88E+02 | 2.15E+02 | 2.58E+02 | 8.20E+02 | 2.05E+02 | 3.07E+03 | 7.15E+02 | 3.19E+03 | 5.64E+02 | 4.84E+03 | 1.05E+03 |            |                 |
|          |                 |                           |                          | 7.20E+01 | 9.48E+03 | 6.70E+01 | 7.12E+02 | 6.10E+02 | 5.57E+02 | 1.68E+03 | 3.42E+02 | 3.50E+03 | 9.41E+02 | 4.22E+03 | 7.22E+02 | 6.30E+03 | 1.39E+03 |            |                 |
|          |                 |                           |                          | 4.90E+01 | 6.91E+03 | 4.50E+01 | 5.37E+02 | 3.87E+02 | 3.81E+02 | 1.27E+03 | 2.56E+02 | 2.63E+03 | 7.46E+02 | 3.36E+03 | 5.87E+02 | 5.10E+03 | 1.14E+03 |            |                 |
|          |                 |                           |                          | 1.50E+01 | 1.38E+03 | 1.00E+01 | 1.10E+02 | 1.18E+02 | 1.46E+02 | 5.52E+02 | 2.12E+02 | 2.76E+03 | 7.38E+02 | 3.36E+03 | 6.16E+02 | 5.34E+03 | 9.89E+02 |            |                 |
|          |                 |                           |                          | 7.20E+01 | 7.02E+03 | 4.30E+01 | 2.92E+02 | 1.66E+02 | 1.41E+02 | 5.57E+02 | 1.75E+02 | 2.14E+03 | 6.24E+02 | 2.67E+03 | 5.13E+02 | 4.44E+03 | 9.70E+02 |            |                 |
|          |                 |                           |                          | 2.00E+01 | 4.43E+03 | 2.40E+01 | 2.80E+02 | 3.11E+02 | 3.53E+02 | 9.60E+02 | 2.30E+02 | 2.55E+03 | 6.91E+02 | 2.77E+03 | 5.14E+02 | 4.38E+03 | 9.07E+02 |            |                 |
|          |                 |                           |                          | 1.80E+01 | 3.78E+03 | 2.00E+01 | 2.03E+02 | 2.30E+02 | 2.91E+02 | 9.30E+02 | 2.51E+02 | 2.84E+03 | 8.12E+02 | 3.44E+03 | 6.49E+02 | 5.63E+03 | 1.26E+03 |            |                 |
|          |                 |                           |                          | 3.90E+01 | 3.09E+03 | 4.30E+01 | 3.31E+02 | 2.59E+02 | 3.92E+02 | 8.25E+02 | 1.78E+02 | 1.84E+03 | 5.31E+02 | 2.23E+03 | 4.13E+02 | 3.50E+03 | 7.30E+02 |            |                 |
|          |                 |                           |                          | 8.20E+01 | 8.04E+03 | 4.70E+01 | 3.49E+02 | 2.39E+02 | 2.10E+02 | 8.22E+02 | 2.17E+02 | 2.49E+03 | 7.06E+02 | 2.85E+03 | 5.67E+02 | 4.98E+03 | 1.04E+03 |            |                 |
| Namibia  | Rossing         | Damaran belt              | Intrusive                | 2.70E+02 | 3.90E+03 | 4.90E+02 | 2.60E+03 | 1.50E+03 | 8.80E+01 | N.A.     | 5.50E+02 | 4.30E+03 | 8.90E+02 | 2.90E+03 | 4.50E+02 | N.A.     | 8.10E+01 | SIMS       | 9 <sup>a</sup>  |
|          |                 |                           |                          | 2.70E+02 | 3.60E+03 | 4.30E+02 | 2.70E+03 | 1.40E+03 | 7.50E+01 | N.A.     | 3.80E+02 | 3.10E+03 | 6.90E+02 | 1.90E+03 | 3.20E+02 | N.A.     | 5.60E+01 |            |                 |
| Russia   | Strel'tsovskoye | Stretsovskaya<br>caldeira | Volcanic-related         | 9.20E+01 | 1.50E+03 | 3.50E+02 | 3.10E+03 | 2.20E+03 | 2.20E+02 | N.A.     | 5.70E+02 | 3.60E+03 | 6.90E+02 | 1.80E+03 | 2.00E+02 | N.A.     | 1.20E+02 | SIMS       | 9 <sup>a</sup>  |
|          |                 |                           |                          | 6.10E+01 | 1.10E+03 | 2.50E+02 | 2.10E+03 | 1.80E+03 | 1.50E+02 | N.A.     | 5.90E+02 | 4.10E+03 | 8.30E+02 | 2.30E+03 | 2.70E+02 | N.A.     | 1.60E+02 |            |                 |
|          |                 |                           |                          | 6.30E-01 | 5.60E-01 | 1.00E-01 | 9.70E-01 | 7.40E+01 | 9.00E+00 | N.A.     | 3.10E-01 | 1.40E+00 | 3.30E-01 | 6.20E-01 | 1.30E-01 | N.A.     | 1.00E-01 |            |                 |
|          |                 |                           |                          | 6.90E-01 | 5.10E-01 | 1.10E-01 | 1.00E+00 | 9.60E+01 | 1.10E+01 | N.A.     | 3.40E-01 | 1.60E+00 | 3.80E-01 | 6.70E-01 | 1.50E-01 | N.A.     | 1.00E-01 |            |                 |
| 6.50E-01 | 6.50E-01        | 1.50E-01                  | 1.30E+00                 | 7.60E+01 | 9.30E+00 | N.A.     | 3.20E-01 | 1.60E+00 | 3.50E-01 | 5.80E-01 | 9.30E-02 | N.A.     | 1.00E-01 |          |          |          |          |            |                 |
| 1.00E+00 | 1.30E+00        | 1.50E-01                  | 1.20E+00                 | 7.80E+01 | 9.60E+00 | N.A.     | 3.00E-01 | 1.40E+00 | 3.00E-01 | 5.60E-01 | 1.30E-01 | N.A.     | 1.00E-01 |          |          |          |          |            |                 |

Table.1. (Continued)

| Country | Deposit Name | Location       | Deposit Type   | La       | Ce       | Pr       | Nd       | Sm       | Eu       | Gd   | Tb       | Dy       | Ho       | Er       | Tm       | Yb   | Lu       | Instrument | Reference      |
|---------|--------------|----------------|----------------|----------|----------|----------|----------|----------|----------|------|----------|----------|----------|----------|----------|------|----------|------------|----------------|
|         |              |                |                | 1.60E+02 | 3.50E+02 | 1.20E+02 | 5.40E+02 | 2.50E+02 | 4.80E+01 | N.A. | 6.20E+01 | 2.90E+02 | 5.50E+01 | 1.00E+02 | 1.40E+01 | N.A. | 3.30E+00 |            |                |
|         |              |                |                | 1.20E+02 | 2.60E+02 | 9.30E+01 | 4.20E+02 | 2.10E+02 | 3.80E+01 | N.A. | 4.90E+01 | 2.30E+02 | 4.30E+01 | 7.10E+01 | 8.20E+00 | N.A. | 2.60E+00 |            |                |
| Zambia  | Kawanga      | Katanga system | Synmetamorphic | 1.30E+02 | 2.70E+02 | 9.60E+01 | 4.30E+02 | 2.00E+02 | 4.00E+01 | N.A. | 5.00E+01 | 2.40E+02 | 4.50E+01 | 8.40E+01 | 1.10E+01 | N.A. | 2.60E+00 | SIMS       | 9 <sup>a</sup> |
|         |              |                |                | 1.40E+02 | 3.00E+02 | 1.10E+02 | 4.70E+02 | 2.20E+02 | 4.20E+01 | N.A. | 5.10E+01 | 2.50E+02 | 4.60E+01 | 8.50E+01 | 1.10E+01 | N.A. | 2.60E+00 |            |                |
|         |              |                |                | 1.40E+02 | 3.40E+02 | 1.10E+02 | 5.00E+02 | 2.40E+02 | 4.50E+01 | N.A. | 5.00E+01 | 2.70E+02 | 5.00E+01 | 9.10E+01 | 1.10E+01 | N.A. | 2.70E+00 |            |                |
|         |              |                |                | 1.50E+02 | 3.10E+02 | 1.10E+02 | 4.50E+02 | 2.30E+02 | 4.10E+01 | N.A. | 4.90E+01 | 2.40E+02 | 4.50E+01 | 8.60E+01 | 1.10E+01 | N.A. | 2.60E+00 |            |                |

<sup>a</sup> Because of interferences, the concentrations of Gd and Yb could not be measured by SIMS; the relative standard deviation was lower than  $\pm 20\%$  for REE concentrations higher than 10ppm and got worse ( $\pm 50\%$  to  $\pm 70\%$ ) for those lower than 10ppm when a standard uraninite from Mistamisk was measured as unknown samples; the concentrations lower than limit of detections (LODs) were taken as the value of LODs.

<sup>b</sup> Analytical accuracy and reproducibility were not reported.

<sup>c</sup> The precision was typically  $\pm 10\text{-}15\%$  at 95% confidence.

<sup>d</sup> Due to the heterogeneity, the relative standard deviations of Ce, Pr, and Nd compositions were 27%, 11% and 12% respectively when measuring the standard uraninite, while it was less than 10% for the other REEs.

<sup>e</sup> The analytical errors of La, Pr, and Sm were 50% ; Nd and Eu were 30% ; Gd and Tb were 20% ; and the other REEs were less than 15% when measuring a standard material.

## References

- [1] IAEA, *Nuclear forensics support, IAEA nuclear security series No. 2*, Vienna, 2006.
- [2] V. Badaut, M. Wallenius and K. Mayer, *J. Radioanal. Nucl. Ch.*, 2009, 280, 57-61.
- [3] E. Keegan, M. Wallenius, K. Mayer, Z. Varga and G. Rasmussen, *Appl. Geochem.*, 2012, 27, 1600-1609.
- [4] E. Keegan, S. Richter, I. Kelly, H. Wong, P. Gadd, H. Kuehn and A. Alonso-Munoz, *Appl. Geochem.*, 2008, 23, 765-777.
- [5] Z. Varga, M. Wallenius, K. Mayer and M. Meppen, *Radiochim. Acta.*, 2011, 1, 1-4.
- [6] Z. Varga, M. Wallenius, K. Mayer, E. Keegan and S. Millet, *Anal. Chem.*, 2009, 81, 8327-8334.
- [7] S. H. Han, Z. Varga, J. Krajko, M. Wallenius, K. Song and K. Mayer, *J. Anal. At. Spectrom.*, 2013, 28, 1919-1925.
- [8] G. A. Brennecke, L. E. Borg, I. D. Hutcheon, M. A. Sharp and A. D. Anbar, *Earth. Planet. Sc. Lett.*, 2010, 291, 228-233.
- [9] J. Mercadier, M. Cuney, P. Lach, M. C. Boiron, J. Bonhoure, A. Richard, M. Leisen and P. Kister, *Terra Nova*, 2011, 23, 264-269.
- [10] Z. Varga, M. Wallenius and K. Mayer, *Radiochim. Acta.*, 2010, 98, 771-778.
- [11] M. Robel and M. J. Kristo, 2<sup>nd</sup> Workshop on Nonproliferation Nuclear Forensics, Beijing, China, 2010.
- [12] M. Rene, *Terra Nova*, 2008, 20, 52-58.
- [13] J. A. McCreath, A. A. Finch, S. L. Simonsen, C. H. Donaldson and A. Armour-Brown, *Contrib. Mineral. Petr.*, 2012, 163, 967-982.
- [14] Y. Takahashi, H. Yoshida, N. Sato, K. Hama, Y. Yusa and H. Shimizu, *Chem. Geol.*, 2002, 184, 311-335.
- [15] K. Horie, Y. Tsutsumi, M. Cho, Y. Morishita and H. Hidaka, *Phys. Chem. Earth.*, 2010, 35, 284-291.
- [16] IAEA. *World Distribution of Uranium Deposits (UDEPO) with Uranium Deposit Classification, IAEATECHDOC-1629*, Vienna, 2009.
- [17] S. Göb, J. E. Gühring, M. Bau and G. Markl, *Am. Mineral.*, 2013, 98, 530-548.
